# Supplementary material for: Lem2 and Lnp1 maintain the membrane boundary between the nuclear envelope and endoplasmic reticulum
Source: PubMed Central journal article supplement (PMC7264229; doi:10.1038/s42003-020-0999-9), 2020-06-01
Supplement: 42003_2020_999_MOESM1_ESM.pdf [file 42003_2020_999_MOESM1_ESM.pdf]

## Description of Additional Supplementary Files

### **File Name: Supplementary Movie 1**

#### **Description: Behavior of nuclear protein in *lem2Δlnp1Δ* cells**

Time-lapse images of *lem2Δlnp1Δ* cells expressing GFP-GST-NLS (green) and Ish1-mCherry and Atb2-mCherry (magenta) were obtained every 5 min. Optical section images at 1- $\mu$ m focal interval were obtained at each timepoint and projected using the maximum intensity method. Projected images after denoising and deconvolution are presented. Scale bar represents 10  $\mu$ m.

### **File Name: Supplementary Movie 2**

#### **Description: Behavior of nuclear protein in WT cells**

Time-lapse images of WT cells expressing GFP-GST-NLS (green) and Ish1-mCherry and Atb2-mCherry (magenta) were obtained as described in Movie 1. Scale bar represents 10  $\mu$ m.

### **File Name: Supplementary Movie 3**

#### **Description: Behavior of nuclear protein in *lem2Δ* cells**

Time-lapse images of *lem2Δ* cells expressing GFP-GST-NLS (green) and Ish1-mCherry and Atb2-mCherry (magenta) were obtained as described in Movie 1. Scale bar represents 10  $\mu$ m.

### **File Name: Supplementary Movie 4**

#### **Description: Behavior of nuclear protein in *lnp1Δ* cells**

Time-lapse images of *lnp1Δ* cells expressing GFP-GST-NLS (green) and Ish1-mCherry and Atb2-mCherry (magenta) were obtained as described in Movie 1. Scale bar represents 10  $\mu$ m.

### **File Name: Supplementary Movie 5**

#### **Description: Behavior of nuclear protein in *lem2Δlnp1Δ* cells overexpressing Apq12**

Time-lapse images of Apq12-overexpressing *lem2Δlnp1Δ* cells expressing GFP-GST-NLS (green) and Ish1-mCherry and Atb2-mCherry (magenta) were obtained as described in Movie 1. Scale bar represents 10  $\mu$ m.

### **File Name: Supplementary Movie 6**

#### **Description: Behavior of nuclear protein in *cmp7Δ* cells**

Time-lapse images of *cmp7Δ* cells expressing GFP-GST-NLS (green) and Ish1-mCherry and Atb2-mCherry (magenta) were obtained as described in Movie 1. Scale bar represents 10  $\mu$ m.

**File Name: Supplementary Data 1**

**Description: *S. pombe* strains used in this study**
